# Supplementary material
Source: Springer Nature journal article supplement (https://www.springermedizin.de/resource/supplementary/12967_2011_984_MOESM2_ESM.pdf/9577238)

interstitium

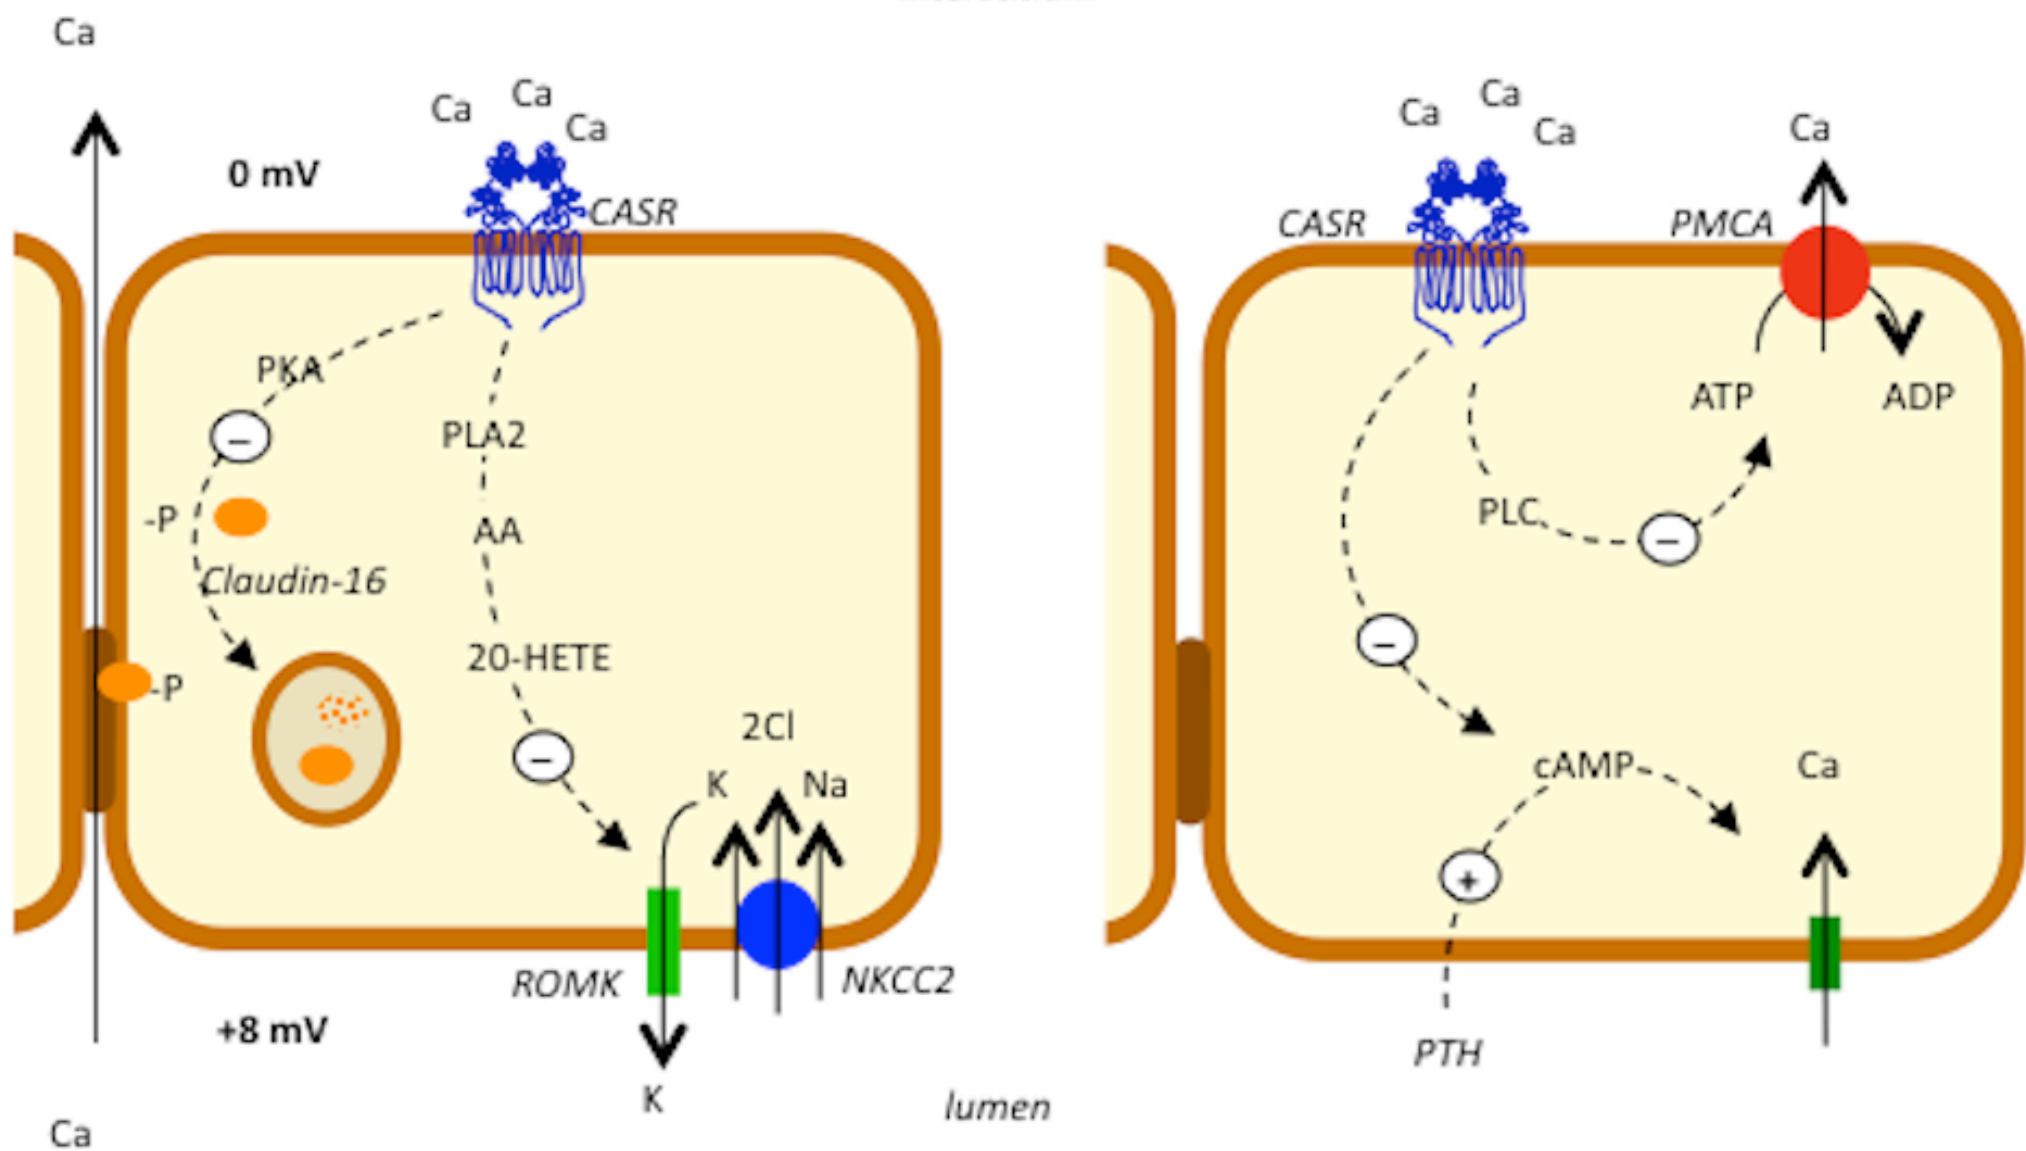

Supplement: MOESM2 [file 9577238]
